# Supplementary material for: Purification, characterization and molecular cloning of a dicaffeoylquinic acid-hydrolyzing esterase from human-derived Lactobacillus fermentum LF-12
Source: Royal Society of Chemistry journal article supplement (doi:10.1039/d0fo00029a), 2020-01-01
Supplement: d0fo00029a1.pdf [file d0fo00029a1.pdf]

**Purification, characterization and molecular cloning of a dicaffeoylquinic acids-  
hydrolyzing esterase from human-derived *Lactobacillus fermentum* LF-12**

Yujin Liu,<sup>a</sup> Minhao Xie,<sup>a,b</sup> Peng Wan,<sup>a</sup> Guijie Chen,<sup>a</sup> Chunxu Chen,<sup>a</sup> Dan Chen,<sup>a</sup> Shijie Yu,<sup>a</sup> Xiaoxiong Zeng<sup>a,\*</sup>, Yi Sun<sup>a,\*</sup>

<sup>a</sup>College of Food Science and Technology, Nanjing Agricultural University, Nanjing 210095, Jiangsu, China

<sup>b</sup>Collaborative Innovation Center for Modern Grain Circulation and Safety, College of Food Science and Engineering, Nanjing University of Finance and Economics, Nanjing 210023, China

\*Corresponding author:

Xiaoxiong Zeng, E-mail: [zengxx@njau.edu.cn](mailto:zengxx@njau.edu.cn), Phone: +86 25 84396791

Yi Sun, E-mail: [sunyi01@njau.edu.cn](mailto:sunyi01@njau.edu.cn), Phone: +86 25 84396791

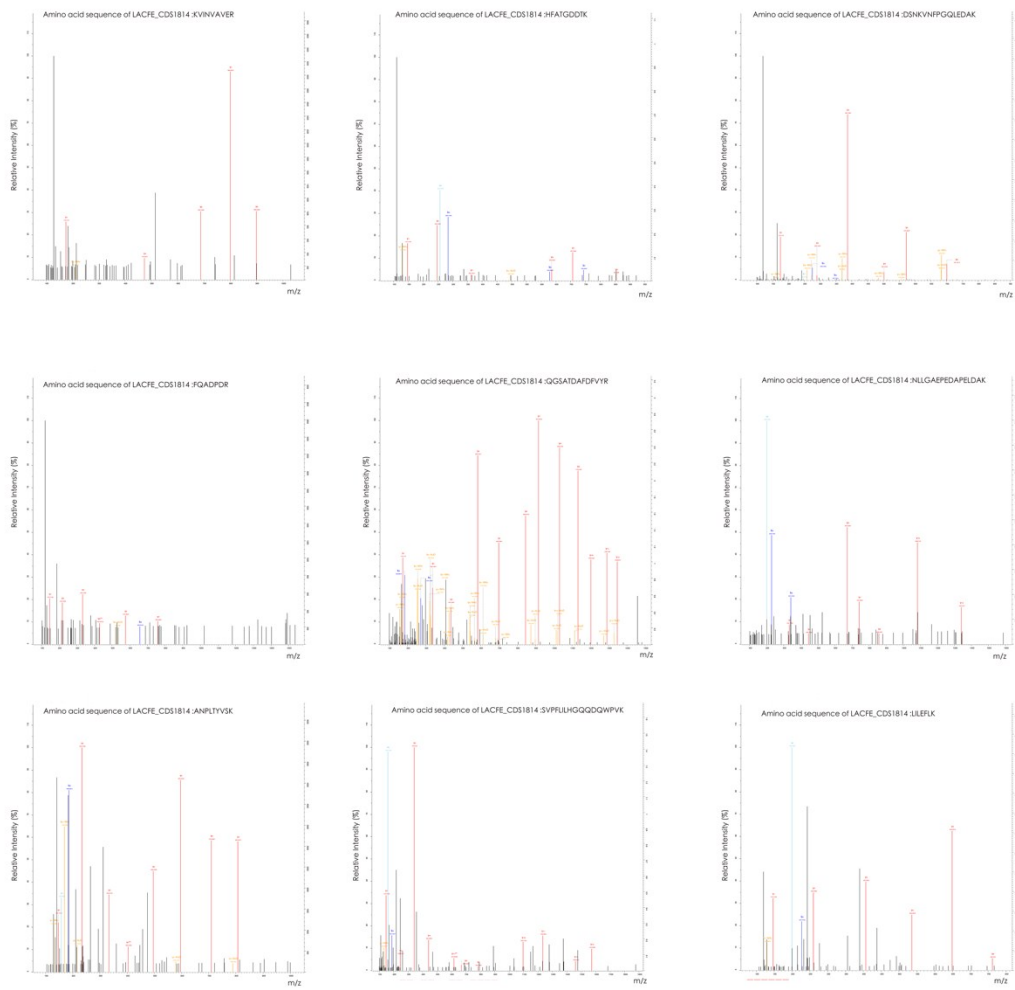

**Fig. S1.** The peptide sequences obtained by tryptic digestion and determined by LC-MS/MS.
